# Supplementary material for: Expansion counteraction effect assisted vanadate with rich oxygen vacancies as a high cycling stability cathode for aqueous zinc-ion batteries
Source: Royal Society of Chemistry journal article supplement (doi:10.1039/d4cp03410d), 2025-01-01
Supplement: d4cp03410d1.pdf [file d4cp03410d1.pdf]

# Supporting information

## Expansion counteraction effect assisted vanadate with rich oxygen vacancies as a high cycling stability cathode for aqueous zinc-ion batteries

### Contents

**Fig. S1** Crystal structures of **NaNVO** (a) along *a*-axis, (b) along *b*-axis and (c) along *c*-axis.

**Fig. S2** XRD pattern of **NaNVO**.

**Fig. S3** TG curve of **NaNVO**.

**Fig. S4** EPR spectroscopy of **NaVO**.

**Fig. S5** (a) SEM image, (b) Na, (c) V and (d) O elemental mapping images of **NaVO**.

**Fig. S6** Charging-discharging curves at 0.1 A g<sup>-1</sup> during the initial five cycles of the **NaVO** cathode.

**Fig. S7** Capacitive contributions to total storage for the **Zn//NaVO** battery at different scan rates.

**Fig. S8** The tunnel of **NaVO** viewed along the (001), (200) and (-111) plane.

**Fig. S9** Zn elemental mapping images of the **NaVO** electrode (a, b) at pristine, (c, d) discharge to 0.1V and (e, f) charge to 1.4 V at first cycle.

**Table S1** Rietveld refinement data of **NaVO**.

**Table S2** ICP analysis for **NaVO** with the atomic ratio for Na and V.

**Table S3** Comparison of the electrochemical performance of **NaVO** and vanadium-based cathode materials for AZIBs.

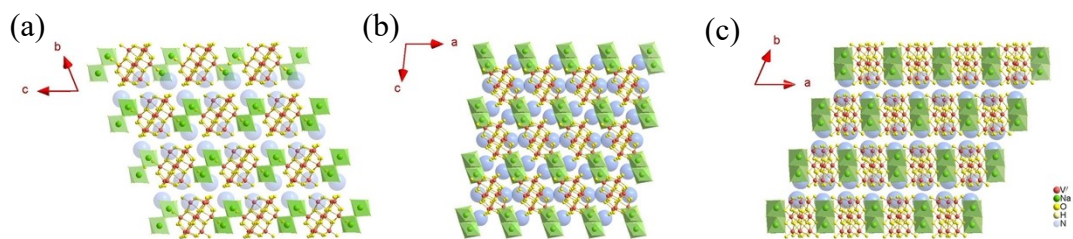

**Fig. S1** Crystal structures of **NaNVO** (a) along *a*-axis, (b) along *b*-axis and (c) along *c*-axis.

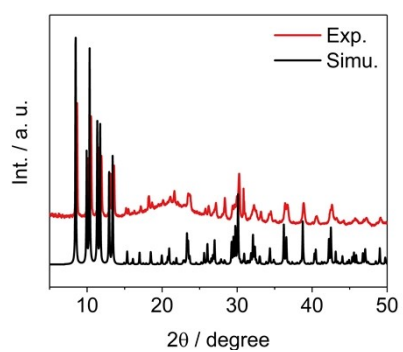

**Fig. S2** XRD pattern of **NaNVO**.

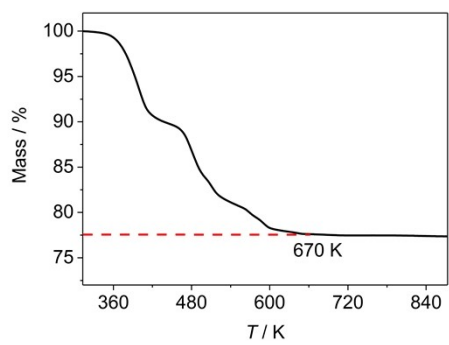

**Fig. S3** TG curve of **NaNVO**.

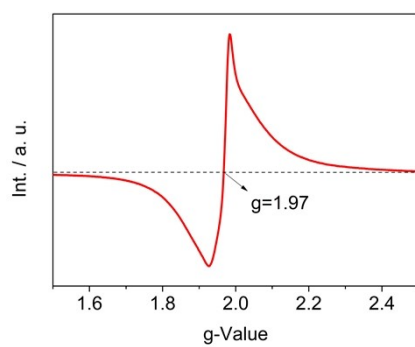

**Fig. S4** EPR spectroscopy of **NaVO**.

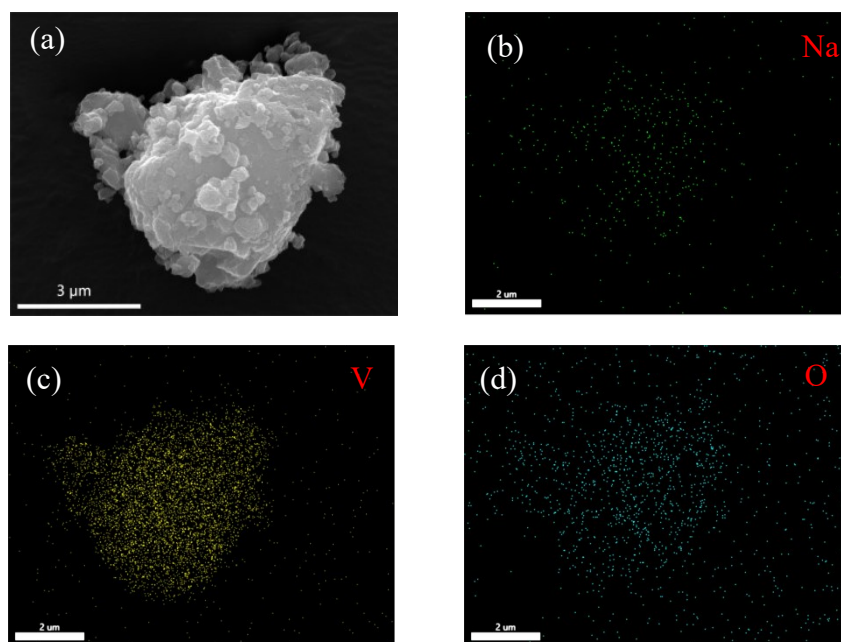

**Fig. S5** (a) SEM image, (b) Na, (c) V and (d) O elemental mapping images of **NaVO**.

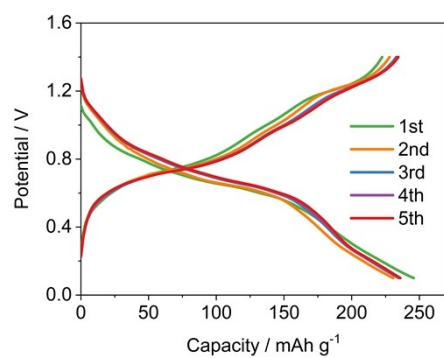

**Fig. S6** Charging-discharging curves at  $0.1 \text{ A g}^{-1}$  during the initial five cycles of the **NaVO** cathode.

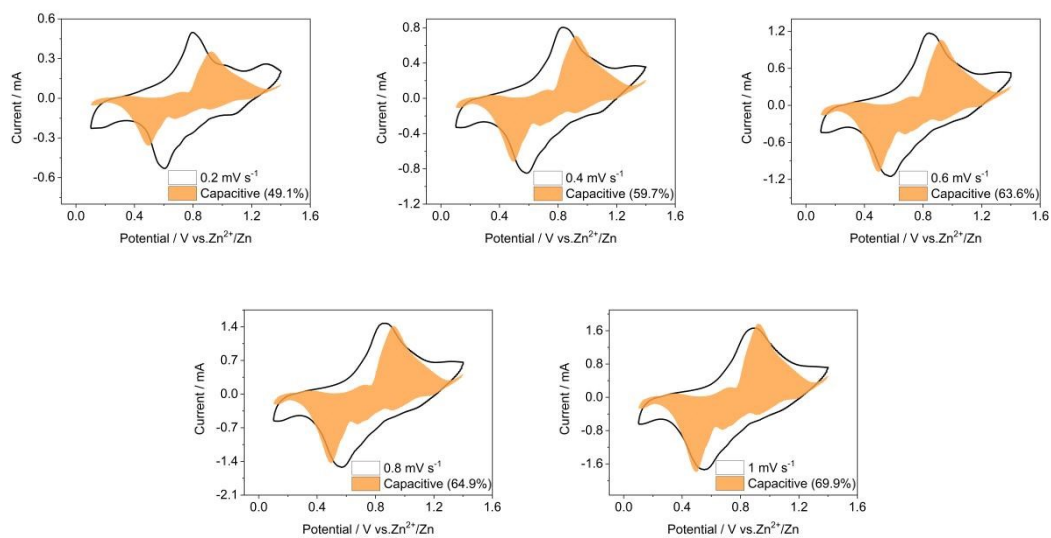

**Fig. S7** Capacitive contributions to total storage for the Zn//NaVO battery at different scan rates.

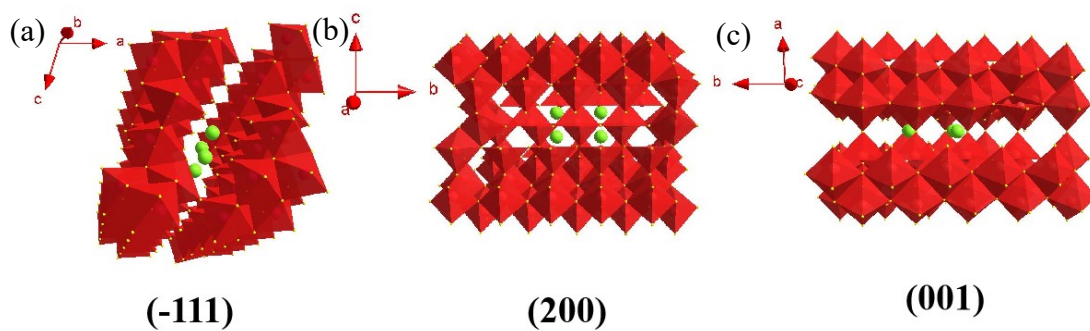

**Fig. S8** The tunnel of NaVO viewed along the (a) (001), (b) (200) and (c) (-111) plane.

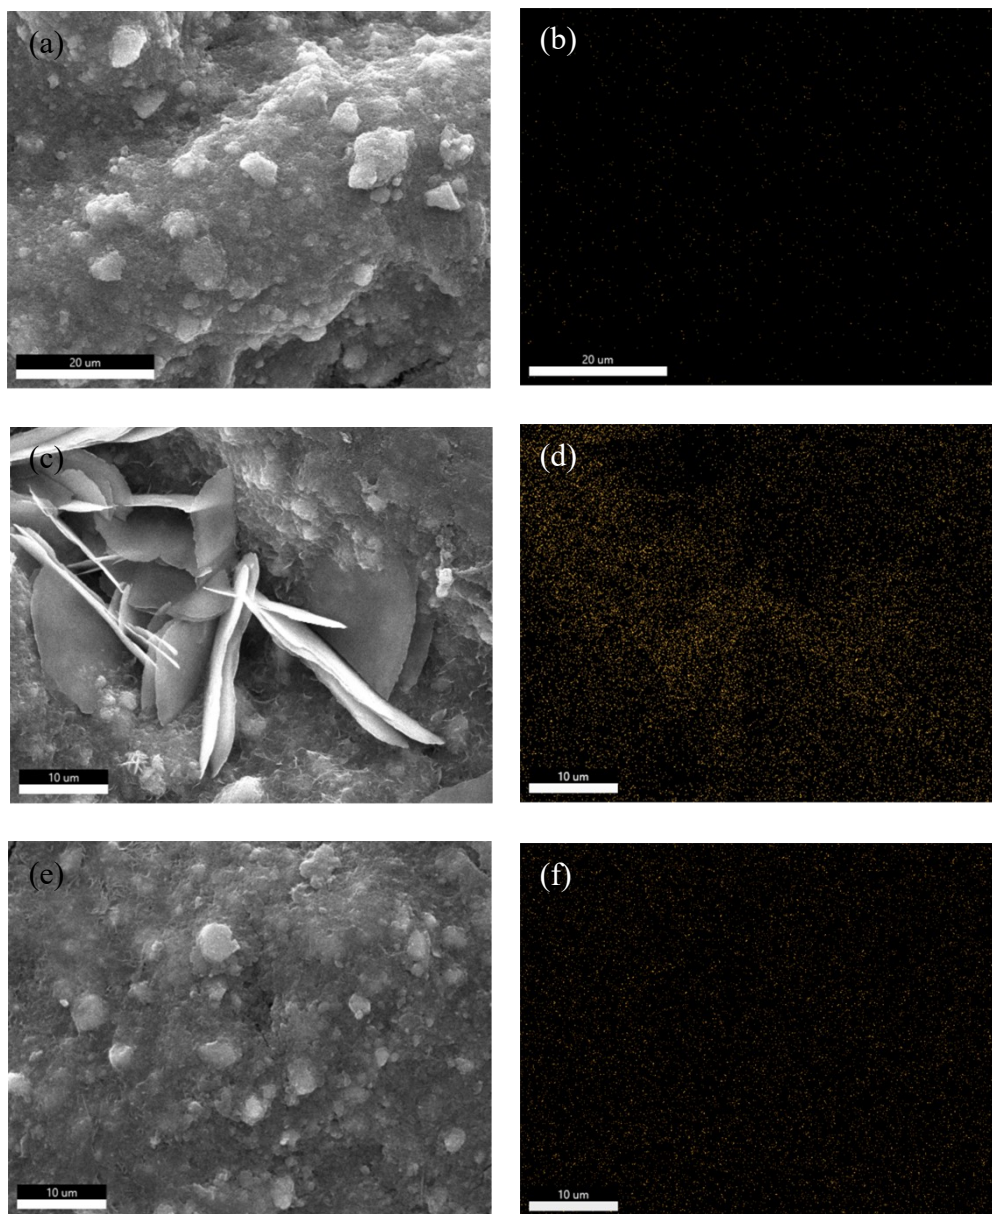

Fig. S9 Zn elemental mapping images of the NaVO electrode (a, b) at pristine, (c, d) discharge to 0.1 V and (e, f) charge to 1.4 V at first cycle.

**Table S1** Rietveld refinement data of **NaVO**.

| Rwp = 12.00%                  |          | Chi <sup>2</sup> : 1.38                       |          |           |
|-------------------------------|----------|-----------------------------------------------|----------|-----------|
| Space group: <i>C 1 2/m 1</i> |          | $a = 15.45, b = 3.61, c = 10.08$ (Å)          |          |           |
|                               |          | $\alpha = \gamma = 90.00, \beta = 109.56$ (°) |          |           |
| Atom                          | X        | Y                                             | Z        | Occupancy |
| Na1                           | -0.00610 | 0.00000                                       | 0.40400  | 0.34875   |
| V1                            | 0.33652  | 0.00000                                       | 0.10323  | 0.50000   |
| V2                            | 0.11433  | 0.00000                                       | 0.12256  | 0.50000   |
| V3                            | 0.28382  | 0.00000                                       | 0.40964  | 0.50000   |
| O1                            | 0.00000  | 0.00000                                       | 0.00000  | 0.25000   |
| O2                            | 0.17105  | 0.00000                                       | -0.03689 | 0.50000   |
| O3                            | 0.37743  | 0.00000                                       | -0.08674 | 0.50000   |
| O4                            | 0.44334  | 0.00000                                       | 0.22874  | 0.50000   |
| O5                            | 0.25996  | 0.00000                                       | 0.22855  | 0.50000   |
| O6                            | 0.10292  | 0.00000                                       | 0.27693  | 0.50000   |
| O7                            | 0.24313  | 0.00000                                       | 0.57003  | 0.50000   |
| O8                            | 0.39445  | 0.00000                                       | 0.47032  | 0.50000   |

**Table S2** ICP analysis for **NaVO** with the atomic ratio for Na and V.

| Sample      | The atomic ratio of Na:V |
|-------------|--------------------------|
| <b>NaVO</b> | 1:4.3                    |

**Table S3** Comparison of the electrochemical performance of **NaVO** and vanadium-based cathode materials for AZIBs.

| Cathode                                                                 | Operating conditions (V) | Current density (A g <sup>-1</sup> ) | Highest capacity (mAh g <sup>-1</sup> ) | Capacity retention (loss / cycle)        | Ref.      |
|-------------------------------------------------------------------------|--------------------------|--------------------------------------|-----------------------------------------|------------------------------------------|-----------|
| Zn <sub>3</sub> V <sub>4</sub> (PO <sub>4</sub> ) <sub>6</sub>          | 0.3–1.9                  | 0.11                                 | ~104.0                                  | 0% / 250                                 | 1         |
| NH <sub>4</sub> V <sub>4</sub> O <sub>10</sub>                          | 0.4–1.4                  | 0.3                                  | ~380.0                                  | 26.0% / 50                               | 2         |
| Ni <sub>0.24</sub> V <sub>5.76</sub> O <sub>13</sub>                    | 0.2–1.4                  | 1.0                                  | ~300.0                                  | 8.6% / 100                               | 3         |
| Ni <sub>0.26</sub> V <sub>2</sub> O <sub>5</sub> ·1.11H <sub>2</sub> O  | 0.3–1.4                  | 0.2                                  | 280.7                                   | 0% / 40                                  | 4         |
| CuVO                                                                    | 0.3–1.4                  | 1.0                                  | 359.0                                   | 26.5% / 50                               | 5         |
| Na <sub>0.56</sub> V <sub>2</sub> O <sub>5</sub>                        | 0.4–1.5                  | 0.5                                  | 196.0                                   | 16.0% / 200                              | 6         |
| Na <sub>0.33</sub> V <sub>2</sub> O <sub>5</sub>                        | 0.2–1.6                  | 0.2                                  | 276.6                                   | 8.7% / 100                               | 7         |
| Na <sub>6</sub> [V <sub>10</sub> O <sub>28</sub> ]·nH <sub>2</sub> O    | 0.2–1.5                  | 0.3                                  | ~150.0                                  | 14.4% / 50                               | 8         |
| PPy-Na <sub>1.1</sub> V <sub>3</sub> O <sub>7.9</sub>                   | 0.4–1.4                  | 1.0                                  | 396.0                                   | 0% / 45                                  | 9         |
| K <sub>0.52</sub> V <sub>2</sub> O <sub>5</sub> ·0.29H <sub>2</sub> O   | 0.4–1.4                  | 0.1                                  | 300.0                                   | 12.0% / 100                              | 10        |
| LiV <sub>3</sub> O <sub>8</sub>                                         | 0.6–1.2                  | 0.13                                 | ~205.0                                  | 24.9% / 65                               | 11        |
| LiV <sub>3</sub> O <sub>8</sub> @NaV <sub>3</sub> O <sub>8</sub>        | 0.3–1.6                  | 0.2                                  | 395.5                                   | 11.0% / 100                              | 12        |
| Zn <sub>3</sub> V <sub>3</sub> O <sub>8</sub> /VO <sub>2</sub>          | 0.3–1.5                  | 0.3                                  | 385.2                                   | 7.8% / 200                               | 13        |
| Zn <sub>0.125</sub> V <sub>2</sub> O <sub>5</sub> ·0.95H <sub>2</sub> O | 0.2–1.6                  | 0.2                                  | 375.0                                   | ~12.0% / 50                              | 14        |
| O                                                                       |                          |                                      |                                         |                                          |           |
| <b>NaVO</b>                                                             | 0.1–1.4                  | 0.1                                  | 254.7                                   | 9.8% / 150<br>11.2% / 300<br>12.7% / 350 | This work |



## References

- [1] D. Zhao, S. Chen, Y. Lai, M. Ding, Y. Cao, Z. Chen, A stable "rocking-chair" zinc-ion battery boosted by low-strain  $\text{Zn}_3\text{V}_4(\text{PO}_4)_6$  cathode, *Nano Energy* 100 (2022) 107520.
- [2] Y. Zheng, C. Tian, Y. Wu, L. Li, Y. Tao, L. Liang, G. Yu, J. Sun, S. Wu, F. Wang, Y. Pang, Z. Shen, Z. Pan, H. Chen, J. Wang, Dual-engineering of ammonium vanadate for enhanced aqueous and quasi-solid-state zinc ion batteries, *Energy Storage Mater.* 52 (2022) 664-674.
- [3] Y.-Y. Liu, G.-Q. Yuan, X.-Y. Wang, J.-P. Liu, Q.-Y. Zeng, X.-T. Guo, H. Wang, C.-S. Liu, H. Pang, Tuning electronic structure of ultrathin  $\text{V}_6\text{O}_{13}$  nanobelts via nickel doping for aqueous zinc-ion battery cathodes, *Chem. Eng. J.* 428 (2022) 132538.
- [4] J. Guo, W. Ma, Y. Zheng, H. Chen, Z. Sang, D.a. Yang, Cation pre-intercalation and oxygen vacancies in vanadium oxide for synergistically enhanced high-rate and stability for zinc-ion batteries, *Appl. Surf. Sci.* 612 (2023) 155876.
- [5] Y. Yang, Y. Tang, S. Liang, Z. Wu, G. Fang, X. Cao, C. Wang, T. Lin, A. Pan, J. Zhou, Transition metal ion-preintercalated  $\text{V}_2\text{O}_5$  as high-performance aqueous zinc-ion battery cathode with broad temperature adaptability, *Nano Energy* 61 (2019) 617-625.
- [6] P. Gao, Q. Ru, H. Yan, S. Cheng, Y. Liu, X. Hou, L. Wei, F. Chi-Chung Ling, A durable  $\text{Na}_{0.56}\text{V}_2\text{O}_5$  nanobelt cathode material assisted by hybrid cationic electrolyte for high-performance aqueous zinc-ion batteries, *ChemElectroChem* 7 (2020) 283-288.
- [7] P. He, G. Zhang, X. Liao, M. Yan, X. Xu, Q. An, J. Liu, L. Mai, Sodium ion stabilized vanadium oxide nanowire cathode for high-performance zinc-ion batteries, *Adv. Energy Mater.* 8 (2018) 1702463.
- [8] H. He, F.-C. Pan, X.-W. Liang, Q. Hu, S. Liu, J. Hu, S.C. Jun, D. Lin, Y. Yamauchi, Y. Huo, Unveiling the effect of structural water on Zn-ion storage of polyoxovanadate for high-rate and long-life aqueous zinc ion battery, *Chem. Eng. J.* 462 (2023) 142221.
- [9] S. Islam, S. Lee, S. Lee, M. Hilmy Alfaruqi, B. Sambandam, V. Mathew, J.-Y. Hwang, J. Kim, Triggering the theoretical capacity of  $\text{Na}_{1.1}\text{V}_3\text{O}_{7.9}$  nanorod cathode by polypyrrole coating for high-energy zinc-ion batteries, *Chem. Eng. J.* 446 (2022) 137069.
- [10] Q. Li, X. Ye, H. Yu, C. Du, W. Sun, W. Liu, H. Pan, X. Rui, Pre-potassiated hydrated vanadium oxide as cathode for quasi-solid-state zinc-ion battery, *Chin. Chem. Lett.* 33 (2022) 2663-2668.
- [11] M.H. Alfaruqi, V. Mathew, J. Song, S. Kim, S. Islam, D.T. Pham, J. Jo, S. Kim, J.P. Baboo, Z. Xiu, K.-S. Lee, Y.-K. Sun, J. Kim, Electrochemical zinc intercalation in lithium vanadium oxide: A high-capacity zinc-ion battery cathode, *Chem. Mater.* 29 (2017) 1684-1694.
- [12] J. Wang, X. Zhao, J. Kang, X. Wang, H. Yu, C.-F. Du, Q. Yan,  $\text{Li}^+$ ,  $\text{Na}^+$  co-stabilized vanadium oxide nanobelts with a bilayer structure for boosted zinc-ion storage performance, *J. Mater. Chem. A* 10 (2022) 21531-21539.
- [13] L. Yang, J. Jian, S. Wang, S. Wang, A. Abliz, F. Zhao, H. Li, J. Wu, Y. Wang,

Capacity-enhanced and kinetic-expedited zinc-ion storage ability in a  $\text{Zn}_3\text{V}_3\text{O}_8/\text{VO}_2$  cathode enabled by heterostructural design, Dalton Trans. 51 (2022) 15436-15445.

[14] J.-J. Ye, P.-H. Li, H.-R. Zhang, Z.-Y. Song, T. Fan, W. Zhang, J. Tian, T. Huang, Y. Qian, Z. Hou, N. Shpigel, L.-F. Chen, S.X. Dou, Manipulating oxygen vacancies to spur ion kinetics in  $\text{V}_2\text{O}_5$  structures for superior aqueous zinc-ion batteries, Adv. Funct. Mater. 33 (2023) 2305659.
